# Supplementary material for: A RNA-Seq Analysis to Describe the Boar Sperm Transcriptome and Its Seasonal Changes
Source: Front Genet. 2019 Apr 16;10:299. doi: 10.3389/fgene.2019.00299 (PMC6476908; doi:10.3389/fgene.2019.00299)
Supplement: FILE S1 — RNA-seq quality and mapping statistics. Average and Standard Deviation (SD) for the 10 boar sperm samples processed, including: amount of RNA extracted and several RNA-seq bioinformatics statistics for both total and small RNA-seq. [file Table_1.XLSX]

## Sheet: Sheet1
	Average	SD
Starting amount of RNA (fg per cell)	2.1	0.6
Total RNA-seq reads	23631767	13945595
Reads passing quality control	2.31994e+07	187600
Proportion of reads passing quality control	0.981705	0.0134523
Proportion of mapped reads in the Sscrofa11.1 genome	0.81292	0.0307224
Unique reads (duplicates removed)	5.60688e+06	2.98809e+06
Proportion of non duplicated reads	0.193083	0.0654523
Unmapped reads for De Novo assembly	5061315	2763218
sncRNA-seq reads	6.60954e+06	1.12309e+06
Reads passing quality control	6.07515e+06	1.45152e+06
Proportion of reads passing quality control	0.919149	0.102048
Proportion of mapped reads	0.817719	0.0186604
Remaining unmapped reads	1.11648e+06	359301
