# Supplementary material for: A RNA-Seq Analysis to Describe the Boar Sperm Transcriptome and Its Seasonal Changes
Source: Front Genet. 2019 Apr 16;10:299. doi: 10.3389/fgene.2019.00299 (PMC6476908; doi:10.3389/fgene.2019.00299)
Supplement: FILE S3 — List of human and bovine genes identified by syntenic alignment of the orphan SREs. Orphan SRE genome coordinates were liftover to human and bovine coordinates, and the genes mapped in these regions were extracted. A total of 45 genes shared in both species were found. From these genes, 44 were already annotated in the Sscrofa Ensembl v.91 annotation. 17 of these genes were also detected by exonic, intronic and/or upstream/downstream 10 kb SREs. This suggests that orphan SREs could correspond to unannotated isoforms or to paralogous genes. [file Table_3.xlsx]

## Sheet: Sheet1
Gene symbol	Gene annotated in Sscrofa Ensembl v.91	Gene detected in the SRE pipeline	SRE biotype
ANXA3	No	No
CDYL	Yes	No
RORA	Yes	No
PPP1R14D	Yes	No
KCNB2	Yes	No
TACC3	Yes	No
CCDC3	Yes	No
XRN1	Yes	No
ZNF300	Yes	No
EDA	Yes	No
ZNF385B	Yes	No
EFCAB6	Yes	No
RIMS2	Yes	No
WDPCP	Yes	No
MS4A13	Yes	No
CCDC7	Yes	No
SRGAP3	Yes	No
FHIT	Yes	No
DNHD1	Yes	No
UNC79	Yes	No
DNAI1	Yes	No
EEA1	Yes	No
FMR1NB	Yes	No
LELP1	Yes	No
SMIM23	Yes	No
TSG101	Yes	No
TTN	Yes	No
UBE2N	Yes	No
UBL7	Yes	Yes	Exon
ABCA3	Yes	Yes	Exon
CLIP4	Yes	Yes	Exon
CYB5R4	Yes	Yes	Exon
CDRT4	Yes	Yes	Exon
RAB3GAP1	Yes	Yes	Exon / upstream-downstream 10 kb
BOLL	Yes	Yes	Exon / upstream-downstream 10 kb
CATSPERE	Yes	Yes	Exon / upstream-downstream 10 kb
PEBP4	Yes	Yes	Exon / intronic
TTC28	Yes	Yes	Exon / intronic
ZEB1	Yes	Yes	Exon / intronic
ANKRD26	Yes	Yes	Exon / intronic
ADARB2	Yes	Yes	Exon / intronic
PPP1R12A	Yes	Yes	Exon / intronic
ST5	Yes	Yes	Exon / intronic / upstream-downstream 10 kb
ADAM32	Yes	Yes	Exon / intronic / upstream-downstream 10 kb
ANHX	Yes	Yes	Exon / intronic / upstream-downstream 10 kb
